# Supplementary material for: Epithelial Cells and Fibroblasts from the Human Female Reproductive Tract Accumulate and Release TFV and TAF to Sustain Inhibition of HIV Infection of CD4+ T cells
Source: PubMed Central journal article supplement (PMC6372694; doi:10.1038/s41598-018-38205-y), 2019-02-12

Epithelial Cells and Fibroblasts from the Human Female Reproductive Tract Accumulate  
and Release TFV and TAF to Sustain Inhibition of HIV Infection of CD4+ T cells

Zheng Shen, Marta Rodriguez-Garcia, Mickey V. Patel, Jack Bodwell,  
and Charles R. Wira

**Supplementary Figure 1. (a)** Correlation between HIV infection of CD4+ T cells treated with basolateral epithelial CM and intracellular TFV-DP levels in EM epithelial cells following TFV (Figure 2b) and TAF (2c) incubation as described in Fig. 2. Vertical bars indicate mean +/- SE of HIV infection. Horizontal bars indicate the mean +/- SE of TFV-DP values. **(b)** Real-time reverse transcription-polymerase chain reaction (RT-PCR) was done to measure the effect of TFV on 4 epithelial cell tight junction genes TJP1, OCLD, CLDN2 and CLDN4. Incubation of cells with TFV (3277 $\mu$ M) had no effect on tight junction gene expression.

**a**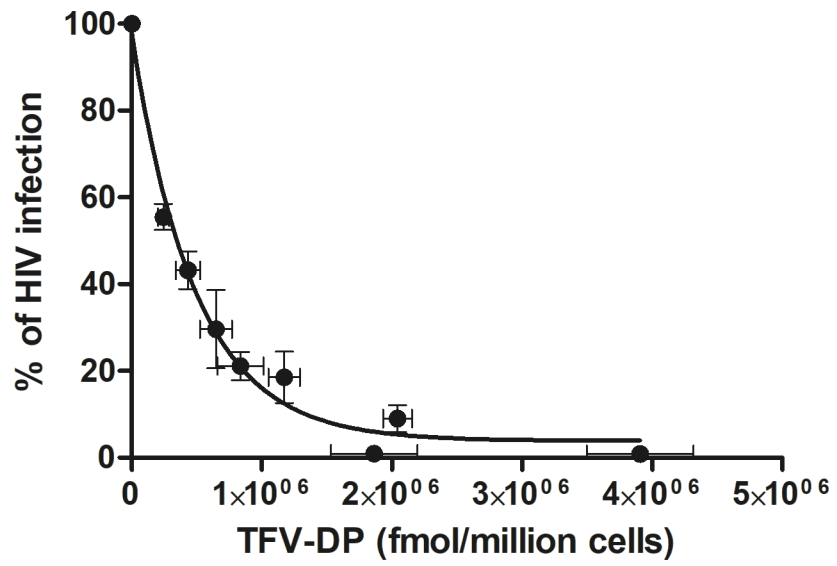**b**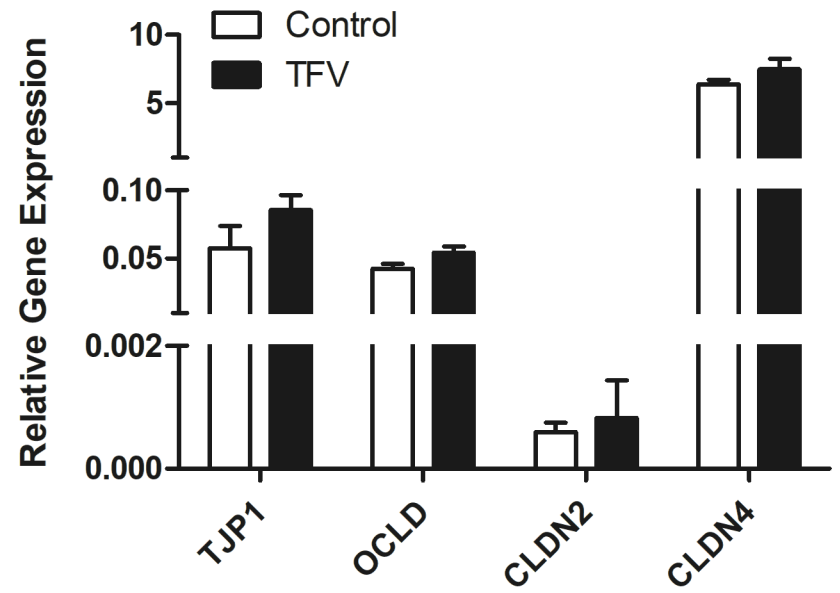

Supplement: 41598_2018_38205_MOESM1_ESM.pdf [file 41598_2018_38205_MOESM1_ESM.pdf]
